# Supplementary material for: Photocleavable linker for the patterning of bioactive molecules
Source: PubMed Central journal article supplement (PMC4680943; doi:10.1038/srep18309), 2015-12-16
Supplement: srep18309-s1.pdf [file srep18309-s1.pdf]

## Photocleavable linker for the patterning of bioactive molecules

Seraphine V. Wegner,<sup>1,2\*</sup> Oya I. Sentürk<sup>1,2</sup> & Joachim P. Spatz<sup>1,2</sup>

<sup>1</sup> Department of New Materials and Biosystems, Institution Max Planck Institute for Intelligent Systems, Heisenbergstr. 3, 70569 Stuttgart, Germany.

<sup>2</sup> Department of Biophysical Chemistry, University of Heidelberg, Im Neuenheimer Feld 253, 69120 Heidelberg, Germany.

E-mail: wegner@is.mpg.de

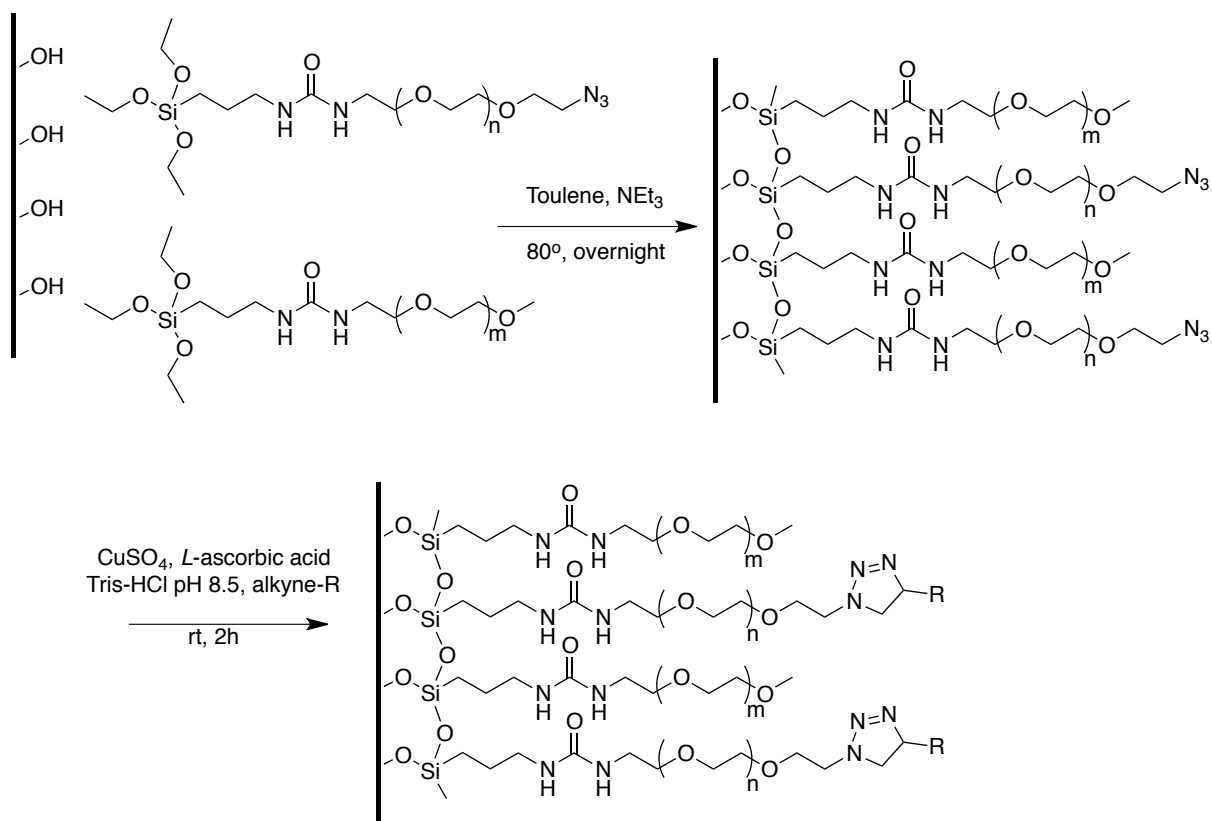

**Figure S1.** PEG-azide coating of SiO<sub>2</sub> surfaces and click-reaction at the surface.

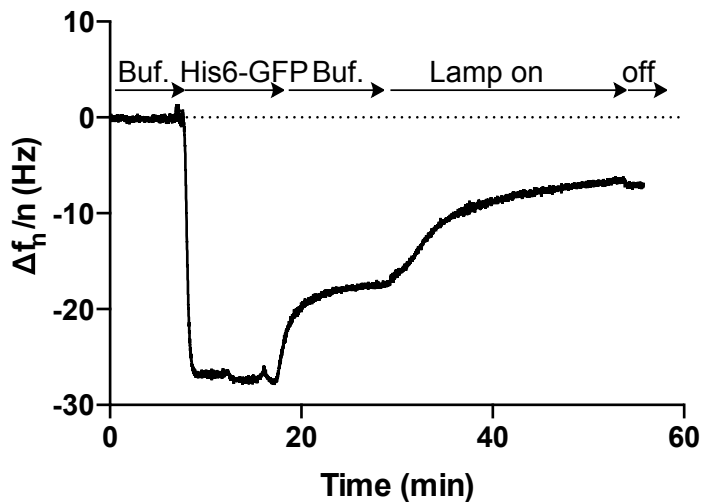

**Figure S2.** His6-GFP binds on SiO<sub>2</sub> QCM crystals coated with 100 % PEG-azide modified with NTA-NO<sub>2</sub>. When the lamp is turned on the His6-GFP is liberated from the surface.

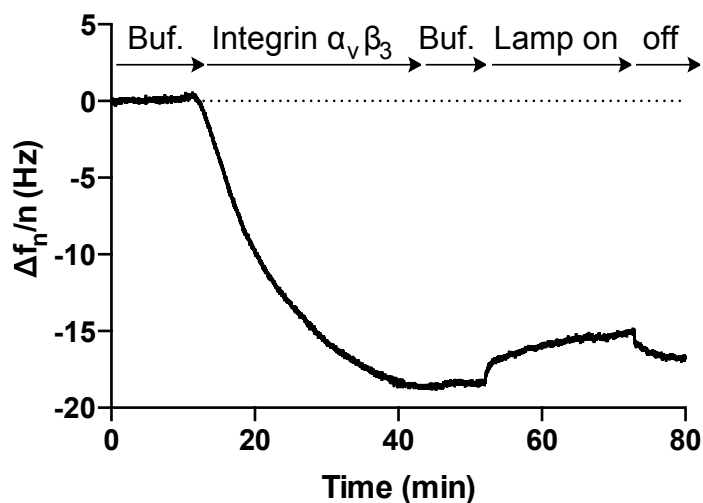

**Figure S3.** QCM measurements showing integrin  $\alpha_v\beta_3$  binding to cRGD-modified 1 % PEG-azide surfaces. Unlike on cRGD-NO<sub>2</sub> modified surfaces, the bound integrin  $\alpha_v\beta_3$  is not washed off from the cRGD-modified surface upon irradiated ( $\lambda = 365$  nm).
